# Supplementary material for: Transcriptome Sequencing of the Diatom Asterionellopsis thurstonii and In Silico Identification of Enzymes Potentially Involved in the Synthesis of Bioactive Molecules
Source: MDPI journal article supplement (doi:10.3390/md21020126), 2023-02-15

**Figure S1. Bayesian consensus tree based on the analysis of ITS region (ITS1, 5.8S and ITS2).**  
Number at nodes are posterior probabilities.

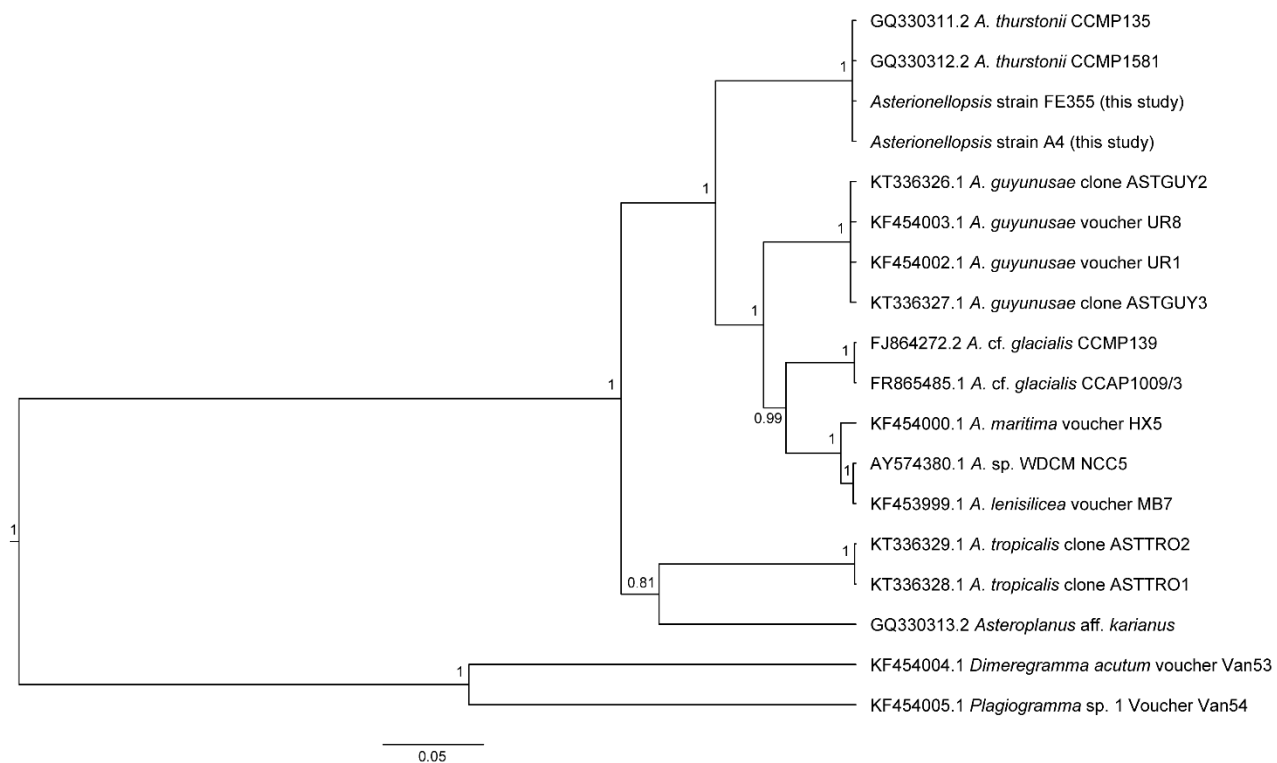

Supplement: s1 [file s1]
