# Supplementary material for: Transcriptome Sequencing of the Diatom Asterionellopsis thurstonii and In Silico Identification of Enzymes Potentially Involved in the Synthesis of Bioactive Molecules
Source: MDPI journal article supplement (doi:10.3390/md21020126), 2023-02-15
Supplement: s1 [file s1]

**Table S6.** The table shows the first seven categories of Gene Ontology (GO) involved in biological process, molecular function and cellular component that were up-regulated.

| <b>GOEA up-regulated A4_Control_vs_FE355_Control</b>           |                                                                          |            |                         |
|----------------------------------------------------------------|--------------------------------------------------------------------------|------------|-------------------------|
| <b>GO Class</b>                                                | <b>GO Description</b>                                                    | <b>FDR</b> | <b>Enrichment score</b> |
| Biological Process                                             | Fatty acid biosynthetic process                                          | 2.37E-03   | 6.81                    |
| Biological Process                                             | Signal transduction                                                      | 3.86E-03   | 4.63                    |
| Biological Process                                             | Phosphorylation                                                          | 3.87E-02   | 2.17                    |
| Biological Process                                             | Transmembrane transport                                                  | 1.57E-01   | 1.45                    |
| Biological Process                                             | Oxidation-reduction process                                              | 2.10E-01   | 1.21                    |
| Biological Process                                             | Proteolysis                                                              | 2.38E-01   | 1.25                    |
| Biological Process                                             | Protein phosphorylation                                                  | 2.68E-01   | 1.20                    |
| Cellular component                                             | Bounding membrane of organelle                                           | 1.18E-03   | 9.84                    |
| Cellular component                                             | Mitochondrial matrix                                                     | 4.97E-03   | 5.37                    |
| Cellular component                                             | Intracellular membrane-bounded organelle                                 | 5.76E-03   | 3.56                    |
| Cellular component                                             | Endoplasmic reticulum                                                    | 5.57E-02   | 1.97                    |
| Cellular component                                             | Integral component of membrane                                           | 1.07E-01   | 1.14                    |
| Cellular component                                             | Cell                                                                     | 3.19E-01   | 1.10                    |
| Cellular component                                             | Cytoplasm                                                                | 4.13E-01   | 1.02                    |
| Molecular function                                             | Lipid binding                                                            | 1.18E-03   | 9.84                    |
| Molecular function                                             | Oxidoreductase activity                                                  | 7.30E-03   | 2.44                    |
| Molecular function                                             | Transferase activity                                                     | 2.54E-02   | 2.68                    |
| Molecular function                                             | Kinase activity                                                          | 2.59E-02   | 2.65                    |
| Molecular function                                             | ATP binding                                                              | 5.88E-02   | 1.41                    |
| Molecular function                                             | Metal ion binding                                                        | 7.49E-02   | 1.51                    |
| Molecular function                                             | Hydrolase activity                                                       | 2.19E-01   | 1.32                    |
| <b>GOAE up-regulated A4_phosphate starvation_vs_A4_Control</b> |                                                                          |            |                         |
| <b>GO Class</b>                                                | <b>GO Description</b>                                                    | <b>FDR</b> | <b>Enrichment score</b> |
| Biological process                                             | Glucose metabolic process                                                | 2.94E-03   | 7.18                    |
| Biological process                                             | Transmembrane receptor protein serine/threonine kinase signaling pathway | 4.60E-03   | 6.39                    |
| Biological process                                             | Regulation of cyclin-dependent protein serine/threonine kinase activity  | 6.21E-03   | 4.79                    |
| Biological process                                             | Negative regulation of apoptotic process                                 | 3.38E-03   | 4.56                    |
| Biological process                                             | Signal transduction                                                      | 1.12E-02   | 2.74                    |
| Biological process                                             | Regulation of transcription from RNA polymerase II promoter              | 1.73E-02   | 2.74                    |
| Biological process                                             | Protein phosphorylation                                                  | 8.86E-03   | 1.76                    |
| Cellular component                                             | Host cell nucleus                                                        | 5.08E-05   | 3.72                    |
| Cellular component                                             | Extracellular region                                                     | 3.93E-04   | 3.28                    |
| Cellular component                                             | Chloroplast thylakoid membrane                                           | 1.53E-01   | 1.53                    |
| Cellular component                                             | Nucleus                                                                  | 8.31E-02   | 1.29                    |

| Cellular component                                                   | Intracellular membrane-bounded organelle                  | 3.27E-01   | 1.13                    |
|----------------------------------------------------------------------|-----------------------------------------------------------|------------|-------------------------|
| Cellular component                                                   | Cytoplasm                                                 | 2.70E-01   | 1.11                    |
| Cellular component                                                   | Nucleoplasm                                               | 4.59E-01   | 0.91                    |
| Molecular function                                                   | Glucose-6-phosphate dehydrogenase activity                | 2.69E-04   | 11.50                   |
| Molecular function                                                   | Glycerophosphodiester phosphodiesterase activity          | 5.62E-05   | 10.95                   |
| Molecular function                                                   | Cyclic-di-GMP binding                                     | 3.02E-04   | 8.52                    |
| Molecular function                                                   | Phospholipase A2 activity                                 | 1.62E-03   | 8.21                    |
| Molecular function                                                   | S-adenosylmethionine-dependent methyltransferase activity | 2.37E-03   | 5.90                    |
| Molecular function                                                   | Chitin binding                                            | 1.94E-03   | 4.42                    |
| Molecular function                                                   | Sequence-specific DNA binding                             | 1.94E-03   | 3.94                    |
| <b>GOAE up-regulated FE355_phosphate starvation_vs_FE355_Control</b> |                                                           |            |                         |
| <b>GO Class</b>                                                      | <b>Go Description</b>                                     | <b>FDR</b> | <b>Enrichment score</b> |
| Biological process                                                   | Cysteine transport                                        | 1.16E-04   | 11.00                   |
| Biological process                                                   | Protein repair                                            | 5.16E-04   | 8.80                    |
| Biological process                                                   | Phospholipid scrambling                                   | 3.58E-04   | 7.34                    |
| Biological process                                                   | Ribosome assembly                                         | 2.94E-03   | 6.29                    |
| Biological process                                                   | rRNA metabolic process                                    | 3.49E-03   | 4.89                    |
| Biological process                                                   | Ribosomal large subunit biogenesis                        | 3.49E-03   | 4.89                    |
| Biological process                                                   | Translation                                               | 1.66E-04   | 2.58                    |
| Cellular component                                                   | Glycosome                                                 | 5.16E-04   | 8.80                    |
| Cellular component                                                   | Pre-ribosome, large subunit precursor                     | 5.66E-05   | 5.71                    |
| Cellular component                                                   | Proton-transporting V-type ATPase, V0 domain              | 8.67E-03   | 4.89                    |
| Cellular component                                                   | Small ribosomal subunit                                   | 1.23E-02   | 4.40                    |
| Cellular component                                                   | Intracellular non-membrane-bounded organelle              | 3.69E-03   | 3.67                    |
| Cellular component                                                   | Nucleolus                                                 | 2.86E-04   | 2.82                    |
| Cellular component                                                   | Ribosome                                                  | 2.98E-03   | 2.24                    |
| Molecular function                                                   | Phosphatidylserine binding                                | 1.16E-04   | 11.00                   |
| Molecular function                                                   | 2-alkenal reductase [NAD(P)] activity                     | 5.16E-04   | 8.80                    |
| Molecular function                                                   | Enhancer binding                                          | 5.16E-04   | 8.80                    |
| Molecular function                                                   | RNA polymerase II regulatory region DNA binding           | 5.16E-04   | 8.80                    |
| Molecular function                                                   | Calcium-dependent phospholipid binding                    | 9.35E-07   | 8.56                    |
| Molecular function                                                   | Phospholipid scramblase activity                          | 3.58E-04   | 7.34                    |
| Molecular function                                                   | Structural constituent of ribosome                        | 2.35E-05   | 2.69                    |

**Table S7.** The table shows the first seven categories of Gene Ontology (GO) involved in biological process, molecular function and cellular component that were down-regulated.

| <b>GOEA down-regulated A4_Control_vs_FE355_Control</b>           |                                                                                |            |                         |
|------------------------------------------------------------------|--------------------------------------------------------------------------------|------------|-------------------------|
| <b>GO Class</b>                                                  | <b>GO Description</b>                                                          | <b>FDR</b> | <b>Enrichment score</b> |
| Biological process                                               | Toll signaling pathway                                                         | 3.19E-05   | 14.42                   |
| Biological process                                               | Negative regulation of cell growth                                             | 3.19E-05   | 14.42                   |
| Biological process                                               | Ribosomal small subunit assembly                                               | 1.50E-04   | 11.54                   |
| Biological process                                               | Positive regulation of oxidative phosphorylation                               | 1.50E-04   | 11.54                   |
| Biological process                                               | Cell wall organization                                                         | 3.23E-04   | 7.69                    |
| Biological process                                               | Proteolysis involved in cellular protein catabolic process                     | 1.05E-04   | 7.39                    |
| Biological process                                               | Translation                                                                    | 3.16E-09   | 4.09                    |
| Cellular component                                               | Synapse                                                                        | 4.25E-04   | 9.61                    |
| Cellular component                                               | Proteasome core complex, alpha-subunit complex                                 | 8.92E-04   | 8.24                    |
| Cellular component                                               | Cytosolic ribosome                                                             | 8.92E-04   | 8.24                    |
| Cellular component                                               | Proteasome complex                                                             | 2.74E-04   | 6.41                    |
| Cellular component                                               | Proteasome core complex                                                        | 8.76E-04   | 6.41                    |
| Cellular component                                               | Ribonucleoprotein complex                                                      | 7.36E-08   | 5.38                    |
| Cellular component                                               | Ribosome                                                                       | 2.77E-07   | 3.66                    |
| Molecular function                                               | Proteasome binding                                                             | 3.19E-05   | 14.42                   |
| Molecular function                                               | Lactoylglutathione lyase activity                                              | 1.50E-04   | 11.54                   |
| Molecular function                                               | Phosphoglycerate kinase activity                                               | 4.25E-04   | 9.61                    |
| Molecular function                                               | RNA polymerase II transcription factor activity, sequence-specific DNA binding | 8.92E-04   | 8.24                    |
| Molecular function                                               | Threonine-type peptidase activity                                              | 6.04E-06   | 7.48                    |
| Molecular function                                               | Endopeptidase activity                                                         | 6.99E-04   | 4.21                    |
| Molecular function                                               | Structural constituent of ribosome                                             | 5.83E-09   | 3.85                    |
| <b>GOAE down-regulated A4_phosphate starvation_vs_A4_Control</b> |                                                                                |            |                         |
| <b>GO Class</b>                                                  | <b>GO Description</b>                                                          | <b>FDR</b> | <b>Enrichment score</b> |
| Biological process                                               | Response to high light intensity                                               | 1.16E-05   | 10.71                   |
| Biological process                                               | Photosystem II stabilization                                                   | 1.52E-04   | 10.04                   |
| Biological process                                               | Carbohydrate derivative biosynthetic process                                   | 1.52E-04   | 10.04                   |

| Biological process                                                     | NAD biosynthetic process                                          | 2.08E-05   | 8.37                    |
|------------------------------------------------------------------------|-------------------------------------------------------------------|------------|-------------------------|
| Biological process                                                     | Response to light stimulus                                        | 6.79E-10   | 7.25                    |
| Biological process                                                     | Response to cold                                                  | 5.06E-04   | 6.69                    |
| Biological process                                                     | Oxidation-reduction process                                       | 3.56E-04   | 1.50                    |
| Cellular component                                                     | Photosystem II oxygen evolving complex                            | 5.06E-04   | 6.69                    |
| Cellular component                                                     | Late endosome                                                     | 1.79E-03   | 6.69                    |
| Cellular component                                                     | Photosystem II                                                    | 6.06E-05   | 5.51                    |
| Cellular component                                                     | Photosystem I                                                     | 2.31E-04   | 5.35                    |
| Cellular component                                                     | Plastid stroma                                                    | 3.07E-03   | 4.87                    |
| Cellular component                                                     | Thylakoid membrane                                                | 4.85E-03   | 4.46                    |
| Cellular component                                                     | Chloroplast                                                       | 3.06E-04   | 2.88                    |
| Molecular function                                                     | Protein transmembrane transporter activity                        | 3.07E-05   | 10.04                   |
| Molecular function                                                     | Glutaminase activity                                              | 1.44E-04   | 8.03                    |
| Molecular function                                                     | Pyruvate kinase activity                                          | 4.08E-04   | 6.69                    |
| Molecular function                                                     | Structural constituent of cuticle                                 | 4.08E-04   | 6.69                    |
| Molecular function                                                     | Potassium ion binding                                             | 1.68E-03   | 5.02                    |
| Molecular function                                                     | Ubiquitin binding                                                 | 7.02E-04   | 4.18                    |
| Molecular function                                                     | 2 iron, 2 sulfur cluster binding                                  | 2.50E-06   | 4.12                    |
| <b>GOAE down-regulated FE355_phosphate starvation_vs_FE355_Control</b> |                                                                   |            |                         |
| <b>GO Class</b>                                                        | <b>GO Description</b>                                             | <b>FDR</b> | <b>Enrichment score</b> |
| Biological process                                                     | Cell morphogenesis                                                | 6.38E-04   | 8.05                    |
| Biological process                                                     | Glyoxylate cycle                                                  | 6.38E-04   | 8.05                    |
| Biological process                                                     | Response to light stimulus                                        | 5.83E-12   | 6.91                    |
| Biological process                                                     | Protein refolding                                                 | 1.73E-03   | 6.71                    |
| Biological process                                                     | Proteasome-mediated ubiquitin-dependent protein catabolic process | 6.45E-05   | 6.19                    |
| Biological process                                                     | tRNA aminoacylation for protein translation                       | 9.73E-04   | 5.96                    |
| Biological process                                                     | Tricarboxylic acid cycle                                          | 4.10E-04   | 3.98                    |
| Cellular component                                                     | Phagocytic vesicle                                                | 6.38E-04   | 8.05                    |
| Cellular component                                                     | Photosystem II                                                    | 5.59E-07   | 6.71                    |
| Cellular component                                                     | Axon                                                              | 1.73E-03   | 6.71                    |
| Cellular component                                                     | Photosystem I                                                     | 3.09E-05   | 5.87                    |
| Cellular component                                                     | Ribonucleoprotein granule                                         | 3.68E-03   | 5.75                    |
| Cellular component                                                     | Cytosol                                                           | 1.73E-03   | 1.68                    |
| Cellular component                                                     | Cytoplasm                                                         | 6.64E-04   | 1.55                    |
| Molecular function                                                     | aminoacyl-tRNA editing activity                                   | 1.04E-05   | 10.73                   |

|                    |                                                             |          |      |
|--------------------|-------------------------------------------------------------|----------|------|
| Molecular function | Oxoglutarate dehydrogenase (succinyl-transferring) activity | 6.38E-04 | 8.05 |
| Molecular function | Inorganic diphosphatase activity                            | 1.89E-04 | 7.67 |
| Molecular function | Hydrogen-translocating pyrophosphatase activity             | 1.89E-04 | 7.67 |
| Molecular function | Single-stranded DNA binding                                 | 3.68E-03 | 5.75 |
| Molecular function | ATP binding                                                 | 1.89E-04 | 1.48 |
| Molecular function | Metal ion binding                                           | 5.79E-04 | 1.62 |

---
