# Supplementary figures and images for: Transcriptome Sequencing of the Diatom Asterionellopsis thurstonii and In Silico Identification of Enzymes Potentially Involved in the Synthesis of Bioactive Molecules
Source: MDPI journal article supplement (doi:10.3390/md21020126), 2023-02-15

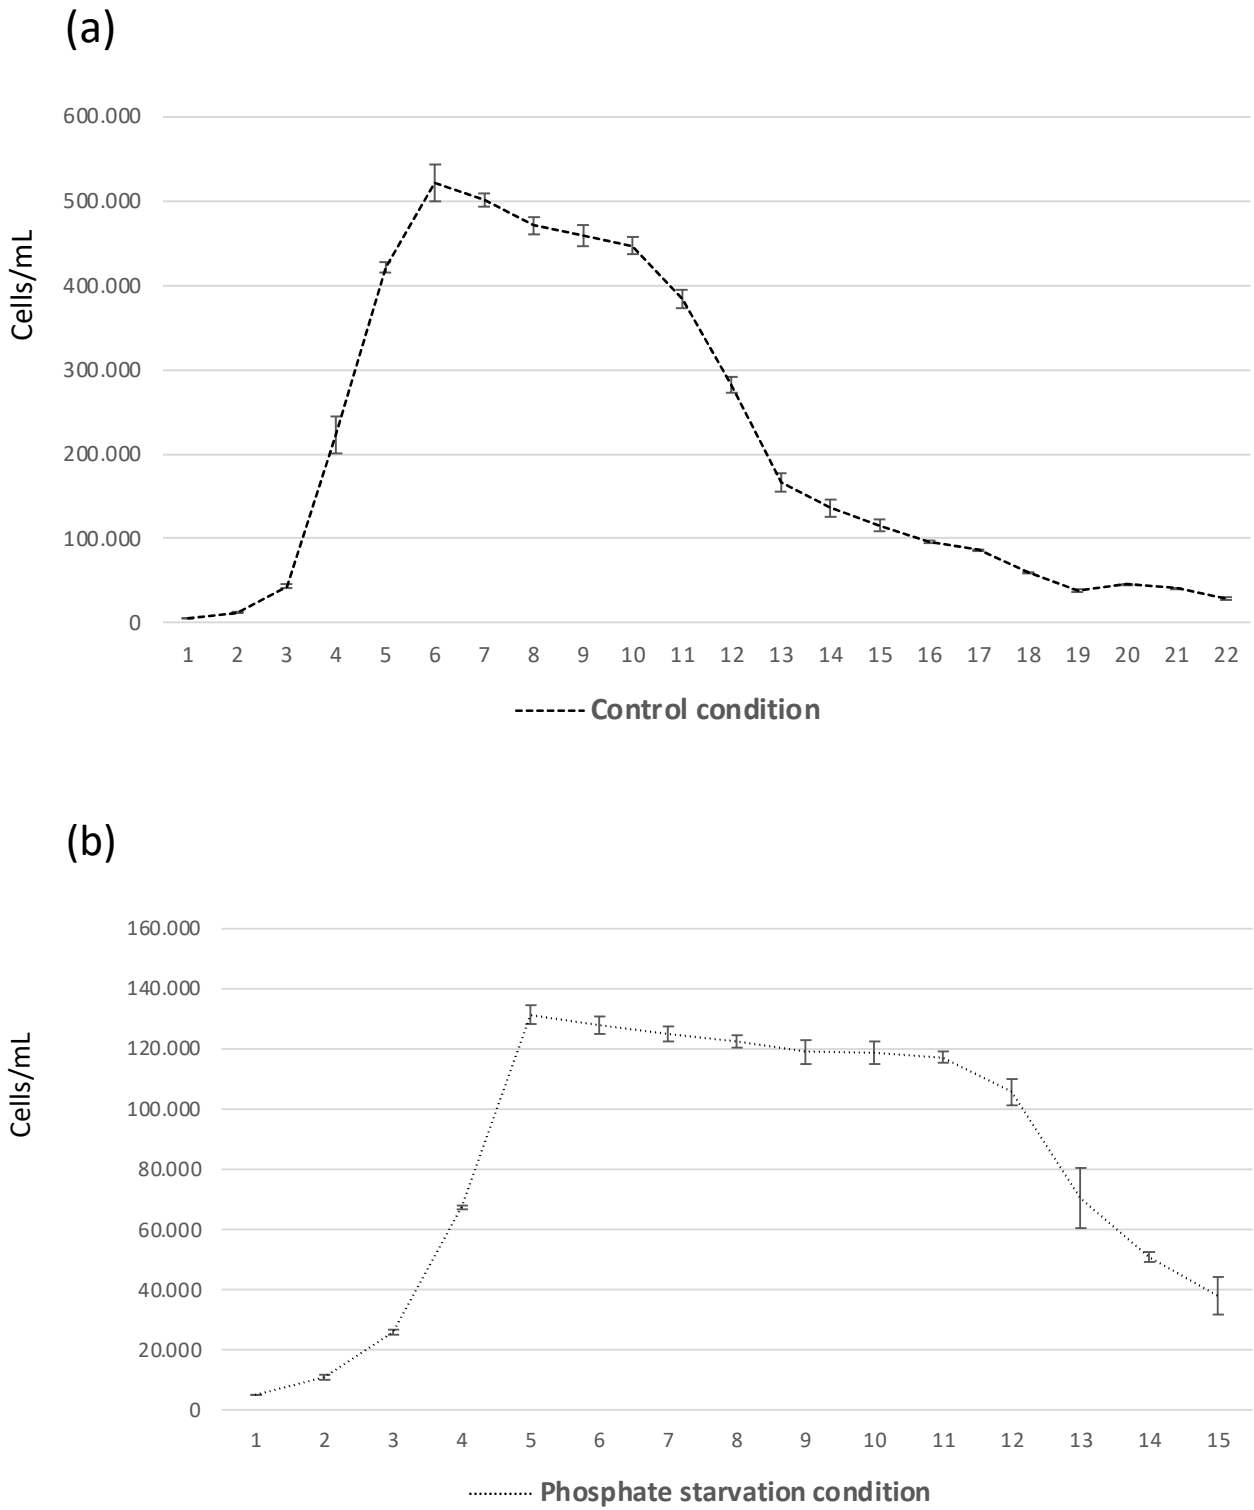

**Figure S2.** Growth curves in (a) control and (b) phosphate starvation conditions

Supplement: s1 [file s1]
